# Supplementary material for: Comparison of Complicated and Simple Guiding Templates in Mandibular Reconstruction Using Vascularized Iliac Crest Flap
Source: Biomed Res Int. 2019 Jun 26;2019:7496538. doi: 10.1155/2019/7496538 (PMC6617867; doi:10.1155/2019/7496538)
Supplement: Supplementary Materials — The detailed information of patient's clinical characteristics, measurement values of length, and ratio were included in the supplementary file. [file 7496538.f1.xlsx]

## Sheet: clinical information
														bony conjuction gap
2013	SGT	NO.	Gender	Age	operation begin	operation finish	time-consuming(min)	pathology	defect type	defect lengh (cm)	defect area			anterior	posterior	max mm		Average alveolar height
		1	F	44	0925	1720	475	Ameloblastoma	L	4.807	37-Condylar neck			1.286	1	1.286		2.819
		2	F	29	0928	1652	444	Ossifying fibroma	L	6.534	33-gonion			2.214	1.643	2.214		3.465
		3	M	28	0916	1640	444	Ameloblastoma	L	6.35	45-Condylar neck			3.643	3.071	3.643		4.571
		4	F	34	1000	1630	390	odontoma complex type	L	6.4	36-Condylar neck			0.714	1.071	1.071		9.021
		5	F	38	1000	1630	390	Ameloblastoma	L	6.907	45-ramus of mandible			0.857	1.429	1.429		10.179
		6	M	28	0930	1530	360	Ameloblastoma	L	4.264	36-ramus of mandible			1.429	2.357	2.357		0.342
		7	F	23	0930	1630	420	Ameloblastoma	L	4.364	41-45			1.429	1.857	1.857		8.5
		8	F	52	0930	1545	375	Ameloblastoma	L	4.85	47-Condylar neck			3.143	5.357	5.357		4.479
		9	F	39	0953	1533	340	osteofibrous dysplasia	L	2.629	45-46			1.142	1.214	1.214		16.059
		10	F	25	0910	1530	380	Reccurent Odontogenic keratocyst	L	5.5	46-Condylar neck			3.321	3.643	3.643		3.372
		11	F	26	0900	1450	350	Ossifying fibroma	L	7.75	45-gonion			2.25	1.357	2.25		7.629
		12	F	29	1000	1615	375	Ameloblastoma	L	4.421	43-45			2.071	2.429	2.429		5.037
		13	F	28	0930	1522	352	dentinogenic ghost cell tumour	L	7.529	35-Condylar neck			1.714	3	3		26.019
	x			32.5385			391.923			5.56192						2.44231		7.80708
	s			8.47167			41.7362			1.49551						1.22072		6.80523
														bony conjuction gap
2016	CGT	NO	Gender	Age	operation begin	operation finish	time-consuming(min)	pathology		defect lengh (cm)	defect area			anterior	posterior	max mm		Average alveolar height
		1	F	24	0937	1420	283	Ameloblastoma	L	6.821	44-Condylar neck			1.285	1.143	1.285		1.65
		2	M	45	0915	1515	360	Ameloblastoma	L	5.357	46-Condylar neck			0.3	1	1		3.411
		3	M	14	0910	1520	370	Ameloblastoma	L	10.5	44-Condylar neck			0.2	0.3	0.3		1.993
		4	M	18	1043	1350	187	Ossifying fibroma	L	6.314	44-gonion			1.286	1.214	1.286		1.468
		5	M	33	0930	1630	420	Recurrent Odontogenic keratocyst	L	8.886	43-Condylar neck			1.143	2.5	2.5		2.865
		6	F	38	0930	1452	322	Ameloblastoma	L	6.857	33-Condylar neck			1.428	0.786	1.428		0.5
		7	M	46	0900	1500	360	Vascular malformations in bone	L	6.2	45-ramus of mandible			1.928	2.286	2.286		0.429
		8	M	33	0900	1415	315	Ameloblastoma	L	5.136	36-ramus of mandible			0.716		0.716		8.453
		9	F	28	0925	1620	415	Ameloblastoma	L	6.221	35-ramus of mandible			1.72	2.357	2.357		0.019
		10	M	30	0925	1620	415	Ameloblastoma	L	6.171	35-ramus of mandible			2.5	1.875	2.5		2.5
		11	M	28	0915	1610	415	Recurrent Odontogenic keratocyst	L	6.293	44-ramus of mandible			1.43	1.857	1.857		4.526
		12	F	45	0922	1438	316	aneurysmal bone cyst	L	6.5	45-ramus of mandible			1.803		1.803		2.274
		13	F	45	0915	1540	385	clear cell odontogenic carcinoma	L	7.264	36-Condylar neck			0.857	0.857	0.857		5.462
		14	F	41	0930	1300	210	cementum dysplasia	L	3.9	42-45			1.941	0.941	1.941		6.183
	x			31.2222			340.929			6.60143						1.57971		2.98093
	s			9.90931			74.4575			1.58463						0.70669		2.4202
	p						0.0198132									0.016109		0.0098392

## Sheet: midline deviation
												2016	CGT
	2013	SGT										NO.
	NO.		Deviation direction									1	pre-surgery20150217	Left	0.5				0.5
	1	pre-surgery20131007	Right	1.071			0.215						post-surgery20150416		0	0.5			0.786
		post-surgery20131022	Right	1.286	0.215		0.5					2	pre-surgery20150930		0				0.34
	2	pre-surgery20130702		0			2.143						post-surgery20151022	Left	0.786	0.786			2.714
		post-surgery20131009	Right	0.5	0.5		2					3	pre-surgery20160624	Left	0.928				0.071
	3	pre-surgery20131031	Left	1.643			0.857						post-surgery20161014	Left	1.286	0.34			2
		post-surgery20131114	Left	2.143	2.143		0.928					4	pre-surgery20150311	Right	1.214				0.5
	4	pre-surgery20131031		0			1.714						post-surgery20151010	Right	3.928	2.714			1.217
		post-surgery20140106	Left	2	2		0.572					5	pre-surgery20161009	Right	1.428				0.072
	5	pre-surgery20130703	Left	1.786			0.286						post-surgery20161027	Right	1.357	0.071			1.357
		post-surgery20130717	Left	0.929	0.857		2.286					6	pre-surgery20170517	Right	2				0.857
	6	pre-surgery20130627	Left	0.643			0.929						post-surgery20170609		0	2			0.571
		post-surgery20130712	Right	1.571	0.928		2.357					7	pre-surgery20161110	Right	0.5				1.643
	7	pre-surgery20140323	Right	4.857			0.429						post-surgery20161124		0	0.5			1.4
		post-surgery20140409	Right	3.143	1.714							8	pre-surgery20170224	Right	1.433
	8	pre-surgery20140417	Right	0.714									post-surgery20170316	Right	2.65	1.217
		post-surgery20140504	Right	1.286	0.572							9	pre-surgery20160301	Right	0.714
	9	pre-surgery20140806	Left	1.929		X	1.17046						post-surgery20160317	Right	0.786	0.072		X	1.002
		post-surgery20140822	Left	1.643	0.286	S	0.777059					10	pre-surgery20160226	Left	1.357			S	0.736587
	10	pre-surgery20140811	Right	3.429									post-surgery20160318		0	1.357
		post-surgery20140902	Right	1.143	2.286							11	pre-surgery20160511	Right	0.5
	11	pre-surgery20140829		0									post-surgery20160526	Left	0.357	0.857
		post-surgery20141103	Left	0.929	0.929							12	pre-surgery20160809		1.565
	12	pre-surgery20141022		0									post-surgery20160824		2.136	0.571
		post-surgery20141110	Right	2.357	2.357							13	pre-surgery20160612	Right	1.643
	13	pre-surgery20141031	Left	0.714									post-surgery20160630		0	1.643
		post-surgery20141117	Right	1.143	0.429							14	pre-surgery20180119		0
													post-surgery20180208		1.4	1.4
										p of	ttest	0.291426
